# Supplementary material for: Highly expressed captured genes and cross-kingdom domains present in Helitrons create novel diversity in Pleurotus ostreatus and other fungi
Source: PubMed Central journal article supplement (PMC4289320; doi:10.1186/1471-2164-15-1071), 2014-12-05
Supplement: 12864_2014_6868_MOESM1_ESM.pdf [file 12864_2014_6868_MOESM1_ESM.pdf]

Table S1. Summary of helitron-like 3'- terminal ends found by HelSearch

| Hairpin family                     | PC9 repeats | Location PC9 (*)                                                                                                      | PC15 repeats | Location PC15 (*)                                                                                                                                                                                                                                                                                                                                |
|------------------------------------|-------------|-----------------------------------------------------------------------------------------------------------------------|--------------|--------------------------------------------------------------------------------------------------------------------------------------------------------------------------------------------------------------------------------------------------------------------------------------------------------------------------------------------------|
| ACATTGA_TG_TCGAATGT                | 2           | scaffold_002:1177418-1181018 (+)<br>scaffold_002:1191260-1194860 (-)                                                  | 2            | scaffold_04:2285016-2288616 (+)<br>scaffold_04:2297555-2301098 (-)                                                                                                                                                                                                                                                                               |
| AGTGAT_GA_ATCACT                   | 2           | scaffold_002:196554-200154 (+)<br>scaffold_002:232065-235665 (-)                                                      | 2            | scaffold_04:3240741-3244341 (+)<br>scaffold_04:3286520-3290120 (-)                                                                                                                                                                                                                                                                               |
| CCCGTGC_TTC_GCACGGG                | 3           | scaffold_091:1-659 (+)<br>scaffold_006:1348145-1351745 (-)<br>scaffold_004:2670410-2674010 (-)                        | 2            | scaffold_07:1391507-1395107 (+)<br>scaffold_07:1521433-1525033 (-)                                                                                                                                                                                                                                                                               |
| CCGTGC_GTA_GCACGG                  | 4           | scaffold_142:1-633 (+)<br>scaffold_478:273-3873 (-)<br>scaffold_007:1079010-1082610 (+)<br>scaffold_044:2511-6111 (-) | 10           | scaffold_01:1414547-1418047 (+)<br>scaffold_01:3751228-3754828 (+)<br>scaffold_01:4537480-4541080 (-)<br>scaffold_02:1934771-1938371 (-)<br>scaffold_05:1418338-1421838 (-)<br>scaffold_07:378958-382559 (+)<br>scaffold_07:2179834-2183434 (+)<br>scaffold_08:26455-30055 (-)<br>scaffold_08:423543-427143 (-)<br>scaffold_11:760623-764223 (+) |
| TCTTAG_CC_CTAAGA                   | 2           | scaffold_006:1916618-1920218 (+)<br>scaffold_006:1959378-1962978(-)                                                   | 2            | scaffold_07:3019518-3023118(+)<br>scaffold_07:3057094-3060694 (-)                                                                                                                                                                                                                                                                                |
| AACCAG_GGC_CTGGTT                  |             |                                                                                                                       | 2            | scaffold_06:103948-107548 (-)<br>scaffold_06:167219-170819 (+)                                                                                                                                                                                                                                                                                   |
| AAGTGTG_CA_CACACTT                 |             |                                                                                                                       | 2            | scaffold_06:1808078-1809368 (+)<br>scaffold_08:1123002-1126602 (+)                                                                                                                                                                                                                                                                               |
| CGTAGCCAC_ACT_GTGGCTACG            |             |                                                                                                                       | 4            | scaffold_02:2341430-2345030 (-)<br>scaffold_02:2382940-2385356 (-)<br>scaffold_02:2383133-2385356 (-)<br>scaffold_02:2383195-2385356 (-)                                                                                                                                                                                                         |
| CTTGTC_GA_GACAAG                   |             |                                                                                                                       | 2            | scaffold_04: 387277-390877 (+)<br>scaffold_04:591329-594929 (-)                                                                                                                                                                                                                                                                                  |
| GGGCAT_CG_ATGCC                    |             |                                                                                                                       | 2            | scaffold_06:350706-354306(-)<br>scaffold_06:2250480-2254080 (-)                                                                                                                                                                                                                                                                                  |
| TCAGGG_CTT_CCCTGA                  |             |                                                                                                                       | 2            | scaffold_02:1198298-1201899 (-)<br>scaffold_07:41882-45482 (+)                                                                                                                                                                                                                                                                                   |
| AAATGC_CG_GCATTT                   | 2           | scaffold_212:206-3806 (+)<br>scaffold_003:2776155-2779755 (+)                                                         |              |                                                                                                                                                                                                                                                                                                                                                  |
| GGACGG_TAG_CCGTCC                  | 2           | scaffold_105:1-3039 (+)<br>scaffold_23:289293-292893 (-)                                                              |              |                                                                                                                                                                                                                                                                                                                                                  |
| TGTGGA_TGAG_TCCACA                 | 2           | scaffold_538:1-401 (+)<br>scaffold_007:1677183-1680783 (-)                                                            |              |                                                                                                                                                                                                                                                                                                                                                  |
| TTGCTC_ATC_GAGCAA                  | 2           | scaffold_011:11207-14807 (-)<br>scaffold_011:11359-14959 (-)                                                          |              |                                                                                                                                                                                                                                                                                                                                                  |
| <b>Total number of repetitions</b> | <b>21</b>   |                                                                                                                       | <b>32</b>    |                                                                                                                                                                                                                                                                                                                                                  |
