# Supplementary material for: Highly expressed captured genes and cross-kingdom domains present in Helitrons create novel diversity in Pleurotus ostreatus and other fungi
Source: PubMed Central journal article supplement (PMC4289320; doi:10.1186/1471-2164-15-1071), 2014-12-05
Supplement: 12864_2014_6868_MOESM4_ESM.pdf [file 12864_2014_6868_MOESM4_ESM.pdf]

Table S3. Matrix of nucleotide similarity between intact copies of HELPO1 family captured genes.

|              | <i>capA</i> | <i>capA</i> | <i>capD</i> | <i>capC</i> | <i>capE</i> | <i>capB</i> | <i>capB</i> | <i>capF</i> | <i>capA2</i> |
|--------------|-------------|-------------|-------------|-------------|-------------|-------------|-------------|-------------|--------------|
| <i>capA</i>  | 100.00      | 99.53       | 44.80       | 53.60       | 54.57       | 43.49       | 43.49       | 38.07       | 45.28        |
| <i>capA</i>  | 99.53       | 100.00      | 44.83       | 53.36       | 54.72       | 43.43       | 43.43       | 37.91       | 45.33        |
| <i>capD</i>  | 44.80       | 44.83       | 100.00      | 74.91       | 54.01       | 40.12       | 40.02       | 30.80       | 41.02        |
| <i>capC</i>  | 53.60       | 53.36       | 74.91       | 100.00      | 62.16       | 46.08       | 46.37       | 41.71       | 49.33        |
| <i>capE</i>  | 54.57       | 54.72       | 54.01       | 62.16       | 100.00      | 42.35       | 42.18       | 41.88       | 46.48        |
| <i>capB</i>  | 43.49       | 43.43       | 40.12       | 46.08       | 42.35       | 100.00      | 99.23       | 47.54       | 60.84        |
| <i>capB</i>  | 43.49       | 43.43       | 40.02       | 46.37       | 42.18       | 99.23       | 100.00      | 47.54       | 60.73        |
| <i>capF</i>  | 38.07       | 37.91       | 30.80       | 41.71       | 41.88       | 47.54       | 47.54       | 100.00      | 74.98        |
| <i>capA2</i> | 45.28       | 45.33       | 41.02       | 49.33       | 46.48       | 60.84       | 60.73       | 74.98       | 100.00       |
