# Supplementary material for: Highly expressed captured genes and cross-kingdom domains present in Helitrons create novel diversity in Pleurotus ostreatus and other fungi
Source: PubMed Central journal article supplement (PMC4289320; doi:10.1186/1471-2164-15-1071), 2014-12-05
Supplement: 12864_2014_6868_MOESM6_ESM.pdf [file 12864_2014_6868_MOESM6_ESM.pdf]

Table S4. Primers used for RT-qPCR expression analyses.

| <b>Name</b>            | <b>Sequence</b>         | <b>Efficiency</b> | <b>Specificity *</b>             |
|------------------------|-------------------------|-------------------|----------------------------------|
| <i>HELPO1.1</i> rep.fw | CCAGATGCCGAGATCAAGCTTCG | 1.87              | <i>HELPO1</i> helicases (4)      |
| <i>HELPO1.1</i> rep.RV | GGCATAATCATGGCAACCTC    |                   |                                  |
| <i>HELPO1.2</i> rep.fw | CCACCAACTCCCACAGAAT     | 1.86              | <i>HELPO1.2</i> helicases (2)    |
| <i>HELPO1.2</i> rep.fw | TCTAGCACCCCCGATTTATG    |                   |                                  |
| <i>HELPO2_dg.fw</i>    | AAACTGCGGACTCCTGAAGA    | 1.87              | <i>HELPO2</i> helicases (6)      |
| <i>HELPO2_dg.rv</i>    | CAGCTGTGGTGCTTCCAGTA    |                   |                                  |
| <i>capA.fw</i>         | AAATGGACCCCTCCGTTTAC    | 1.98              | <i>capA</i> genes (3) - HELPO1   |
| <i>capA.rv</i>         | TTTCTGCAAGGGACCCATAG    |                   |                                  |
| <i>capA2.fw</i>        | CCTGTTGTTGCATGATCCAG    | 1.89              | <i>capA2</i> gene (1) - HELPO1   |
| <i>capA2.rv</i>        | GATGTGCGCCTCAGTAGACA    |                   |                                  |
| <i>capB.fw</i>         | GGGCTTGCTGTATTGGAAAA    | 1.91              | <i>capB</i> genes (2) - HELPO1.2 |
| <i>capB.rv</i>         | TGGGGAGCGAGATAGAATTG    |                   |                                  |
| <i>capC.fw</i>         | CACGAGCAATTTTTGCAATG    | 1.87              | <i>capC</i> genes (6) - HELPO1.3 |
| <i>capC.rv</i>         | GTAAGGGTCCTGAGCAGCAG    |                   |                                  |
| <i>capD.fw</i>         | GCAGAGCAGCGAGAGTTTCT    | /                 | <i>capD</i> gene (1) - HELPO1.3  |
| <i>capD.rv</i>         | AAAATCCCGGTACGTGTTCA    |                   |                                  |
| <i>capF.fw</i>         | CATTGGACTGGGAATCTGCT    | /                 | <i>capF</i> gene (1) - HELPO1.3  |
| <i>capF.rv</i>         | CCCTGCTTTTTGACTTCAGC    |                   |                                  |
| <i>pep_fw</i>          | CTATCTCGGGAACGGTATATCA  | 1.89              | PC15 V2.0 ID:1092697             |
| <i>pep_rv</i>          | CCGCTGGTACTGGTACTATAA   |                   |                                  |

\* In parenthesis is shown the number of gene copies in PC15 genome
