# Supplementary material for: Highly expressed captured genes and cross-kingdom domains present in Helitrons create novel diversity in Pleurotus ostreatus and other fungi
Source: PubMed Central journal article supplement (PMC4289320; doi:10.1186/1471-2164-15-1071), 2014-12-05
Supplement: 12864_2014_6868_MOESM7_ESM.pdf [file 12864_2014_6868_MOESM7_ESM.pdf]

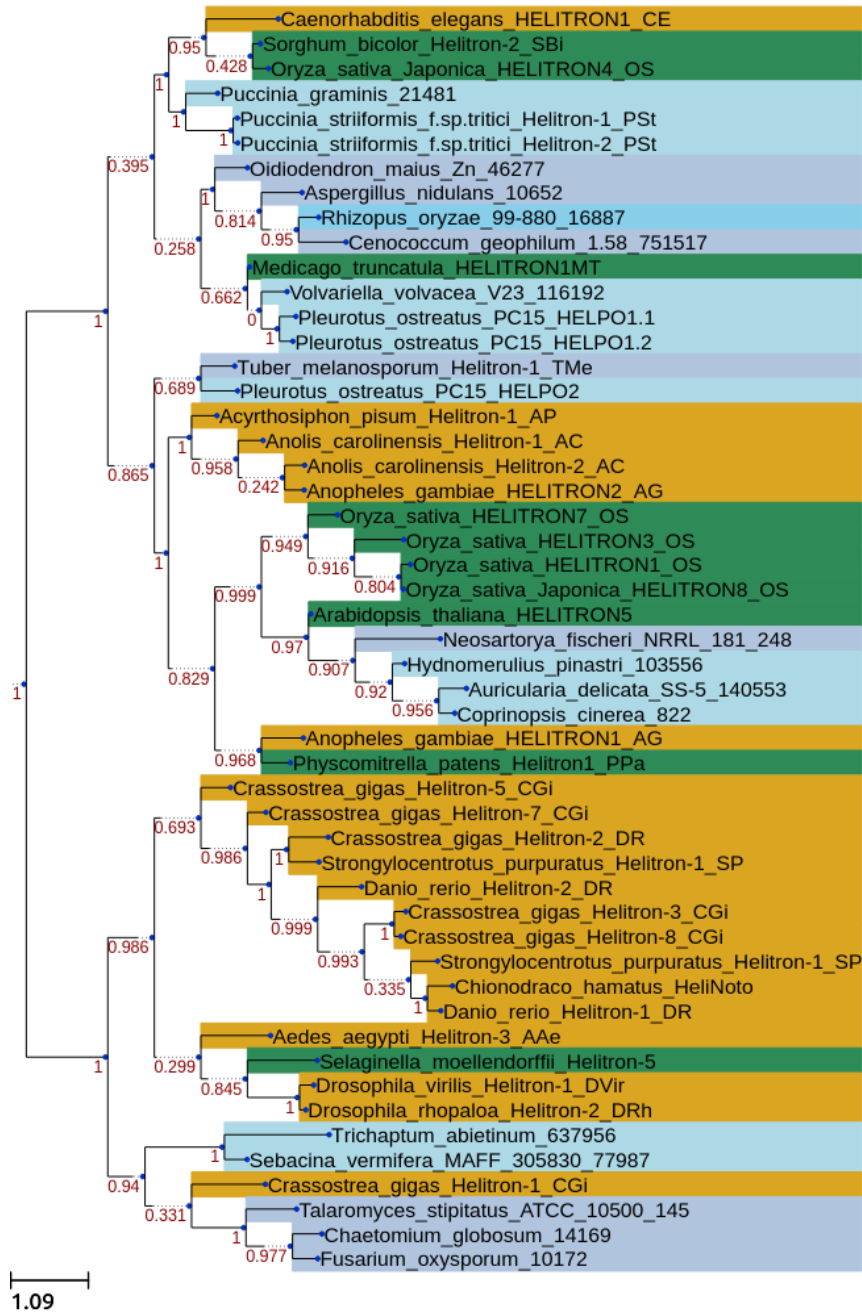

Figure S2. **Phylogenetic reconstruction of eukaryotic Helitron-like helicase domain.** Green represents helitrons from the Plant kingdom, yellow from the Animal s kingdom , and blue from the Fungal kingdom. Light blue represents Class Basidiomycetes and dark blue Class Ascomycetes.
