# Supplementary material for: Highly expressed captured genes and cross-kingdom domains present in Helitrons create novel diversity in Pleurotus ostreatus and other fungi
Source: PubMed Central journal article supplement (PMC4289320; doi:10.1186/1471-2164-15-1071), 2014-12-05
Supplement: 12864_2014_6868_MOESM8_ESM.pdf [file 12864_2014_6868_MOESM8_ESM.pdf]

Table S2. Similarity between intact copies of the HELPO1 and HELPO2 families in PC15 genome.

|                            |        |        |        |        |        |        |        |        |        |        |        |        |        |        |        |        |
|----------------------------|--------|--------|--------|--------|--------|--------|--------|--------|--------|--------|--------|--------|--------|--------|--------|--------|
| helpo1.3_scaffold_08_RC    | 100.00 | 96.58  | 96.27  | 96.01  | 96.63  | 96.81  | 96.67  | 47.45  | 47.56  | 47.56  | 47.56  | 47.56  | 40.72  | 40.65  | 37.84  | 37.85  |
| helpo1.3_scaffold_07_2     | 96.58  | 100.00 | 98.63  | 98.50  | 99.06  | 99.02  | 98.89  | 46.94  | 47.05  | 47.05  | 47.05  | 47.05  | 41.21  | 41.15  | 39.33  | 38.42  |
| helpo1.3_scaffold_02_RC    | 96.27  | 98.63  | 100.00 | 98.19  | 98.59  | 98.83  | 98.70  | 47.11  | 47.22  | 47.22  | 47.22  | 47.22  | 40.55  | 40.49  | 39.24  | 38.34  |
| helpo1.3_scaffold_01_RC    | 96.01  | 98.50  | 98.19  | 100.00 | 98.46  | 98.58  | 98.45  | 47.01  | 47.11  | 47.11  | 47.11  | 47.11  | 40.94  | 40.88  | 39.15  | 38.59  |
| helpo1.3_scaffold_08_42_RC | 96.63  | 99.06  | 98.59  | 98.46  | 100.00 | 98.93  | 98.86  | 47.23  | 47.33  | 47.33  | 47.33  | 47.33  | 40.74  | 40.67  | 39.00  | 38.51  |
| helpo1.3_scaffold_07_1     | 96.81  | 99.02  | 98.83  | 98.58  | 98.93  | 100.00 | 99.87  | 47.23  | 47.33  | 47.33  | 47.33  | 47.33  | 40.87  | 40.81  | 39.32  | 38.51  |
| helpo1.3_scaffold_09_RC    | 96.67  | 98.89  | 98.70  | 98.45  | 98.86  | 99.87  | 100.00 | 47.23  | 47.33  | 47.33  | 47.33  | 47.33  | 40.87  | 40.81  | 39.24  | 38.51  |
| HELPO2_scaffold_01         | 47.45  | 46.94  | 47.11  | 47.01  | 47.23  | 47.23  | 47.23  | 100.00 | 100.00 | 100.00 | 100.00 | 100.00 | 50.20  | 50.25  | 50.18  | 49.01  |
| HELPO2_scaffold_06_RC      | 47.56  | 47.05  | 47.22  | 47.11  | 47.33  | 47.33  | 47.33  | 100.00 | 100.00 | 100.00 | 100.00 | 100.00 | 50.19  | 50.25  | 50.19  | 49.00  |
| HELPO2_scaffold_07_RC      | 47.56  | 47.05  | 47.22  | 47.11  | 47.33  | 47.33  | 47.33  | 100.00 | 100.00 | 100.00 | 100.00 | 100.00 | 50.19  | 50.25  | 50.19  | 49.00  |
| HELPO2_scaffold_08         | 47.56  | 47.05  | 47.22  | 47.11  | 47.33  | 47.33  | 47.33  | 100.00 | 100.00 | 100.00 | 100.00 | 100.00 | 50.19  | 50.25  | 50.19  | 49.00  |
| HELPO2_scaffold_08_2_RC    | 47.56  | 47.05  | 47.22  | 47.11  | 47.33  | 47.33  | 47.33  | 100.00 | 100.00 | 100.00 | 100.00 | 100.00 | 50.19  | 50.25  | 50.19  | 49.00  |
| HELPO1.1_scaffold_07_1     | 40.72  | 41.21  | 40.55  | 40.94  | 40.74  | 40.87  | 40.87  | 50.20  | 50.19  | 50.19  | 50.19  | 50.19  | 100.00 | 99.74  | 56.93  | 56.69  |
| HELPO1.1_scaffold_07_2     | 40.65  | 41.15  | 40.49  | 40.88  | 40.67  | 40.81  | 40.81  | 50.25  | 50.25  | 50.25  | 50.25  | 50.25  | 99.74  | 100.00 | 56.91  | 56.71  |
| HELPO1.1_scaffold_05_RC    | 37.84  | 39.33  | 39.24  | 39.15  | 39.00  | 39.32  | 39.24  | 50.18  | 50.19  | 50.19  | 50.19  | 50.19  | 56.93  | 56.91  | 100.00 | 60.05  |
| HELPO1.2_scaffold_11       | 37.85  | 38.42  | 38.34  | 38.59  | 38.51  | 38.51  | 38.51  | 49.01  | 49.00  | 49.00  | 49.00  | 49.00  | 56.69  | 56.71  | 60.05  | 100.00 |
